# Supplementary material
Source: publisher figshare collection journal article supplement (https://acs.figshare.com/ndownloader/files/4470505)
Supplement: Supplementary file 1 [file 4470505]

 
data_xcf209_0m 
 
_audit_creation_method            SHELXL-97 
_chemical_name_systematic 
; 
 ? 
; 
_chemical_name_common             ? 
_chemical_melting_point           ? 
_chemical_formula_moiety          ? 
_chemical_formula_sum 
 'C52 H62 Cl4 O4 P2 Pd2 S2' 
_chemical_formula_weight          1231.68 
_chemical_absolute_configuration  ad
 
loop_ 
 _atom_type_symbol 
 _atom_type_description 
 _atom_type_scat_dispersion_real 
 _atom_type_scat_dispersion_imag 
 _atom_type_scat_source 
 'C'  'C'   0.0033   0.0016 
 'International Tables Vol C Tables 4.2.6.8 and 6.1.1.4' 
 'H'  'H'   0.0000   0.0000 
 'International Tables Vol C Tables 4.2.6.8 and 6.1.1.4' 
 'O'  'O'   0.0106   0.0060 
 'International Tables Vol C Tables 4.2.6.8 and 6.1.1.4' 
 'P'  'P'   0.1023   0.0942 
 'International Tables Vol C Tables 4.2.6.8 and 6.1.1.4' 
 'S'  'S'   0.1246   0.1234 
 'International Tables Vol C Tables 4.2.6.8 and 6.1.1.4' 
 'Cl'  'Cl'   0.1484   0.1585 
 'International Tables Vol C Tables 4.2.6.8 and 6.1.1.4' 
 'Pd'  'Pd'  -0.9988   1.0072 
 'International Tables Vol C Tables 4.2.6.8 and 6.1.1.4' 
 
_symmetry_cell_setting            Triclinic 
_symmetry_space_group_name_H-M    P1    
 
loop_ 
 _symmetry_equiv_pos_as_xyz 
 'x, y, z' 
 
_cell_length_a                    10.6012(5) 
_cell_length_b                    12.3725(5) 
_cell_length_c                    12.9208(6) 
_cell_angle_alpha                 67.7560(10) 
_cell_angle_beta                  65.9300(10) 
_cell_angle_gamma                 65.8490(10) 
_cell_volume                      1365.60(11) 
_cell_formula_units_Z             1 
_cell_measurement_temperature     100(2) 
_cell_measurement_reflns_used     9352
_cell_measurement_theta_min       3.59
_cell_measurement_theta_max       38.08
 
_exptl_crystal_description        Block 
_exptl_crystal_colour             yellow 
_exptl_crystal_size_max           0.40 
_exptl_crystal_size_mid           0.40 
_exptl_crystal_size_min           0.10 
_exptl_crystal_density_meas       ? 
_exptl_crystal_density_diffrn     1.498 
_exptl_crystal_density_method     'not measured' 
_exptl_crystal_F_000              628 
_exptl_absorpt_coefficient_mu     1.031 
_exptl_absorpt_correction_type    empirical
_exptl_absorpt_correction_T_min   0.7557
_exptl_absorpt_correction_T_max   1.0000
_exptl_absorpt_process_details     
; 
 SADABS Version 2008/1 Bruker-Nonius
 Blessing, Acta Cryst. (1995) A51 33-38
; 
_exptl_special_details 
; 
 It should be noted that the esd's of the cell dimensions are probably too low;
 they should be multiplied by a factor of 2 to 10
; 
_diffrn_ambient_temperature       100(2)
_diffrn_measurement_specimen_suppport
                'magnetic support whith 10 micron nylon fiber cryoloop'
_diffrn_radiation_wavelength      0.71073 
_diffrn_radiation_type            MoK\a 
_diffrn_source                    'rotating anode X-ray tube' 
_diffrn_source_type               'Bruker-Nonius FR 591'
_diffrn_source_power              50
_diffrn_source_current            70
_diffrn_source_size               '3 mm x 0.3 mm fine focus'
_diffrn_radiation_monochromator   'Multilayer Montel 200 mirrors' 
_diffrn_detector_type             '4K CCD area detector APEX II' 
_diffrn_measurement_device_type   'Kappa 4-axis goniometer bruker-nonius' 
_diffrn_measurement_method         
;
 Fullsphere data collection, phi and omega scans
;
_diffrn_detector_area_resol_mean  512 
_diffrn_reflns_number             28395 
_diffrn_reflns_av_R_equivalents   0.0227 
_diffrn_reflns_av_sigmaI/netI     0.0393 
_diffrn_reflns_limit_h_min        -16 
_diffrn_reflns_limit_h_max        18 
_diffrn_reflns_limit_k_min        -21 
_diffrn_reflns_limit_k_max        21 
_diffrn_reflns_limit_l_min        -22 
_diffrn_reflns_limit_l_max        22 
_diffrn_reflns_theta_min          3.58 
_diffrn_reflns_theta_max          38.13 
_reflns_number_total              17508 
_reflns_number_gt                 16893 
_reflns_threshold_expression      >2sigma(I)
 
_computing_data_collection        'Bruker APEX2 v2009.1-0' 
_computing_cell_refinement        'Bruker APEX2 v2009.1-0' 
_computing_data_reduction         'Bruker SAINT V7.60A' 
_computing_structure_solution     'SHELXS-97 (Sheldrick, 2008)' 
_computing_structure_refinement   'SHELXS-97 (Sheldrick, 2008)' 
_computing_molecular_graphics     'Bruker SHELXTL' 
_computing_publication_material   'Bruker SHELXTL' 
 
_refine_special_details 
; 
 Refinement of F^2^ against ALL reflections.  The weighted R-factor wR and 
 goodness of fit S are based on F^2^, conventional R-factors R are based 
 on F, with F set to zero for negative F^2^. The threshold expression of 
 F^2^ > 2sigma(F^2^) is used only for calculating R-factors(gt) etc. and is 
 not relevant to the choice of reflections for refinement.  R-factors based 
 on F^2^ are statistically about twice as large as those based on F, and R- 
 factors based on ALL data will be even larger. 
; 
 
_refine_ls_structure_factor_coef  Fsqd  
_refine_ls_matrix_type            full 
_refine_ls_weighting_scheme       calc  
_refine_ls_weighting_details 
 'calc w=1/[\s^2^(Fo^2^)+(0.0249P)^2^+0.0000P] where P=(Fo^2^+2Fc^2^)/3' 
_atom_sites_solution_primary      direct 
_atom_sites_solution_secondary    difmap 
_atom_sites_solution_hydrogens    geom 
_refine_ls_hydrogen_treatment     noref
_refine_ls_extinction_method      none 
_refine_ls_extinction_coef        ? 
_refine_ls_abs_structure_details 
 'Flack H D (1983), Acta Cryst. A39, 876-881' 
_refine_ls_abs_structure_Flack    -0.028(8) 
_refine_ls_number_reflns          17508 
_refine_ls_number_parameters      603 
_refine_ls_number_restraints      3 
_refine_ls_R_factor_all           0.0243 
_refine_ls_R_factor_gt            0.0230 
_refine_ls_wR_factor_ref          0.0561 
_refine_ls_wR_factor_gt           0.0554 
_refine_ls_goodness_of_fit_ref    1.015 
_refine_ls_restrained_S_all       1.015 
_refine_ls_shift/su_max           0.003 
_refine_ls_shift/su_mean          0.000 
 
loop_ 
 _atom_site_label 
 _atom_site_type_symbol 
 _atom_site_fract_x 
 _atom_site_fract_y 
 _atom_site_fract_z 
 _atom_site_U_iso_or_equiv 
 _atom_site_adp_type 
 _atom_site_occupancy 
 _atom_site_symmetry_multiplicity 
 _atom_site_calc_flag 
 _atom_site_refinement_flags 
 _atom_site_disorder_assembly 
 _atom_site_disorder_group 
Pd1 Pd 0.437927(10) 1.099672(9) 0.742404(8) 0.01220(2) Uani 1 1 d . . . 
Cl1A Cl 0.23071(5) 1.21204(4) 0.68468(3) 0.01804(7) Uani 1 1 d . . . 
P1A P 0.35541(5) 0.94143(4) 0.80344(3) 0.01339(7) Uani 1 1 d . . . 
P1B P 0.04609(5) 0.42366(4) 0.21102(3) 0.01370(7) Uani 1 1 d . . . 
S1A S 0.63000(4) 1.00100(4) 0.81847(3) 0.01463(7) Uani 1 1 d . . . 
O1B O 0.47564(14) 0.81018(12) 0.82575(10) 0.0151(2) Uani 1 1 d . . . 
C1B C 0.55613(18) 0.77662(16) 0.90584(13) 0.0147(3) Uani 1 1 d . . . 
H1B H 0.4887 0.8032 0.9788 0.018 Uiso 1 1 calc R . . 
Cl1B Cl -0.27941(5) 0.76177(4) 0.33833(4) 0.02076(8) Uani 1 1 d . . . 
O1A O 0.19269(13) 0.37135(12) 0.24670(10) 0.0146(2) Uani 1 1 d . . . 
C1A C 0.19559(18) 0.32421(16) 0.36657(13) 0.0138(3) Uani 1 1 d . . . 
H1A H 0.1317 0.2701 0.4110 0.017 Uiso 1 1 calc R . . 
Pd2 Pd -0.112927(10) 0.583128(9) 0.277256(8) 0.01220(2) Uani 1 1 d . . . 
Cl2 Cl 0.53469(5) 1.26589(4) 0.64898(4) 0.01998(8) Uani 1 1 d . . . 
C2B C 0.68122(18) 0.83318(16) 0.85388(13) 0.0139(3) Uani 1 1 d . . . 
H2B H 0.7311 0.8015 0.9153 0.017 Uiso 1 1 calc R . . 
Cl2B Cl -0.19060(5) 0.64367(5) 0.11417(4) 0.02125(8) Uani 1 1 d . . . 
C2A C 0.14527(17) 0.42643(15) 0.42822(12) 0.0128(3) Uani 1 1 d . . . 
H2A H 0.1489 0.3832 0.5103 0.015 Uiso 1 1 calc R . . 
O2B O 0.50129(17) 0.58689(14) 1.00167(12) 0.0223(3) Uani 1 1 d . . . 
S3 S -0.04119(4) 0.52604(4) 0.44174(3) 0.01200(6) Uani 1 1 d . . . 
C3B C 0.79583(18) 0.79523(16) 0.74575(13) 0.0146(3) Uani 1 1 d . . . 
C3A C 0.24292(17) 0.50712(16) 0.37945(13) 0.0136(3) Uani 1 1 d . . . 
O3 O 0.38322(16) 0.14599(14) 0.31987(13) 0.0218(3) Uani 1 1 d . . . 
C4B C 0.76623(19) 0.83678(17) 0.63819(14) 0.0173(3) Uani 1 1 d . . . 
H4B H 0.6729 0.8893 0.6328 0.021 Uiso 1 1 calc R . . 
C4A C 0.3372(2) 0.48620(19) 0.44023(16) 0.0206(3) Uani 1 1 d . . . 
H4A H 0.3422 0.4202 0.5083 0.025 Uiso 1 1 calc R . . 
C5B C 0.8734(2) 0.80121(18) 0.53942(14) 0.0193(3) Uani 1 1 d . . . 
H5B H 0.8523 0.8278 0.4674 0.023 Uiso 1 1 calc R . . 
C5A C 0.4235(2) 0.5618(2) 0.4013(2) 0.0274(4) Uani 1 1 d . . . 
H5A H 0.4885 0.5461 0.4423 0.033 Uiso 1 1 calc R . . 
C6B C 1.0105(2) 0.72712(18) 0.54655(16) 0.0223(4) Uani 1 1 d . . . 
H6B H 1.0841 0.7044 0.4789 0.027 Uiso 1 1 calc R . . 
C6A C 0.4157(2) 0.6602(2) 0.30293(18) 0.0263(4) Uani 1 1 d . . . 
H6A H 0.4737 0.7124 0.2773 0.032 Uiso 1 1 calc R . . 
C7B C 1.0406(2) 0.6859(2) 0.65246(17) 0.0247(4) Uani 1 1 d . . . 
H7B H 1.1347 0.6348 0.6572 0.030 Uiso 1 1 calc R . . 
C7A C 0.3219(2) 0.68117(19) 0.24261(15) 0.0225(4) Uani 1 1 d . . . 
H7A H 0.3161 0.7481 0.1753 0.027 Uiso 1 1 calc R . . 
C8B C 0.9326(2) 0.71964(18) 0.75203(15) 0.0198(3) Uani 1 1 d . . . 
H8B H 0.9533 0.6904 0.8245 0.024 Uiso 1 1 calc R . . 
C8A C 0.2363(2) 0.60505(17) 0.27992(13) 0.0178(3) Uani 1 1 d . . . 
H8A H 0.1732 0.6198 0.2376 0.021 Uiso 1 1 calc R . . 
C9B C 0.5836(2) 1.03619(18) 0.96176(15) 0.0196(3) Uani 1 1 d . . . 
C9A C -0.15348(18) 0.43987(16) 0.57683(13) 0.0152(3) Uani 1 1 d . . . 
C10B C 0.4858(3) 0.9661(2) 1.06529(16) 0.0269(4) Uani 1 1 d . . . 
H10A H 0.5388 0.8785 1.0818 0.040 Uiso 1 1 calc R . . 
H10B H 0.3996 0.9790 1.0458 0.040 Uiso 1 1 calc R . . 
H10C H 0.4562 0.9959 1.1345 0.040 Uiso 1 1 calc R . . 
C10A C -0.1119(2) 0.30420(18) 0.58318(15) 0.0195(3) Uani 1 1 d . . . 
H10D H -0.1796 0.2668 0.6520 0.029 Uiso 1 1 calc R . . 
H10E H -0.0133 0.2628 0.5895 0.029 Uiso 1 1 calc R . . 
H10F H -0.1160 0.2961 0.5122 0.029 Uiso 1 1 calc R . . 
C11B C 0.5089(3) 1.1747(2) 0.94244(19) 0.0299(5) Uani 1 1 d . . . 
H11A H 0.4135 1.1943 0.9343 0.045 Uiso 1 1 calc R . . 
H11B H 0.5682 1.2179 0.8710 0.045 Uiso 1 1 calc R . . 
H11C H 0.4975 1.2004 1.0096 0.045 Uiso 1 1 calc R . . 
C11A C -0.3093(2) 0.5057(2) 0.57472(17) 0.0247(4) Uani 1 1 d . . . 
H11D H -0.3215 0.4963 0.5077 0.037 Uiso 1 1 calc R . . 
H11E H -0.3322 0.5929 0.5676 0.037 Uiso 1 1 calc R . . 
H11F H -0.3747 0.4704 0.6475 0.037 Uiso 1 1 calc R . . 
C12B C 0.7288(2) 1.0012(2) 0.98227(19) 0.0283(4) Uani 1 1 d . . . 
H12A H 0.7130 1.0234 1.0528 0.042 Uiso 1 1 calc R . . 
H12B H 0.7914 1.0450 0.9146 0.042 Uiso 1 1 calc R . . 
H12C H 0.7754 0.9127 0.9926 0.042 Uiso 1 1 calc R . . 
C12A C -0.1308(2) 0.45514(19) 0.67998(14) 0.0217(4) Uani 1 1 d . . . 
H12D H -0.1605 0.5425 0.6757 0.033 Uiso 1 1 calc R . . 
H12E H -0.0283 0.4184 0.6761 0.033 Uiso 1 1 calc R . . 
H12F H -0.1893 0.4143 0.7539 0.033 Uiso 1 1 calc R . . 
C13B C 0.6172(2) 0.63730(17) 0.93622(14) 0.0178(3) Uani 1 1 d . . . 
H13A H 0.6717 0.6090 0.8635 0.021 Uiso 1 1 calc R . . 
H13B H 0.6844 0.6102 0.9826 0.021 Uiso 1 1 calc R . . 
C13A C 0.35048(18) 0.24811(16) 0.36156(14) 0.0160(3) Uani 1 1 d . . . 
H13C H 0.4168 0.2976 0.3083 0.019 Uiso 1 1 calc R . . 
H13D H 0.3626 0.2200 0.4405 0.019 Uiso 1 1 calc R . . 
C14B C 0.5535(3) 0.4593(2) 1.0537(2) 0.0343(5) Uani 1 1 d . . . 
H14A H 0.6182 0.4166 0.9920 0.051 Uiso 1 1 calc R . . 
H14B H 0.4714 0.4262 1.0988 0.051 Uiso 1 1 calc R . . 
H14C H 0.6066 0.4474 1.1059 0.051 Uiso 1 1 calc R . . 
C14A C 0.5263(2) 0.0691(2) 0.3160(2) 0.0278(4) Uani 1 1 d . . . 
H14D H 0.5952 0.1126 0.2570 0.042 Uiso 1 1 calc R . . 
H14E H 0.5431 -0.0051 0.2953 0.042 Uiso 1 1 calc R . . 
H14F H 0.5398 0.0467 0.3929 0.042 Uiso 1 1 calc R . . 
C15B C 0.30181(19) 0.91965(17) 0.69855(13) 0.0159(3) Uani 1 1 d . . . 
C15A C 0.1300(2) 0.44700(17) 0.05499(14) 0.0186(3) Uani 1 1 d . . . 
C16B C 0.1588(2) 0.97238(19) 0.69504(16) 0.0210(3) Uani 1 1 d . . . 
H16B H 0.0882 1.0179 0.7498 0.025 Uiso 1 1 calc R . . 
C16A C 0.2275(2) 0.5148(2) 0.00118(15) 0.0242(4) Uani 1 1 d . . . 
H16A H 0.2432 0.5512 0.0460 0.029 Uiso 1 1 calc R . . 
C17B C 0.1197(2) 0.9583(2) 0.61126(18) 0.0260(4) Uani 1 1 d . . . 
H17B H 0.0226 0.9941 0.6086 0.031 Uiso 1 1 calc R . . 
C17A C 0.3024(3) 0.5299(2) -0.11825(17) 0.0316(5) Uani 1 1 d . . . 
H17A H 0.3694 0.5758 -0.1548 0.038 Uiso 1 1 calc R . . 
C18B C 0.2245(2) 0.8913(2) 0.53130(17) 0.0269(4) Uani 1 1 d . . . 
H18B H 0.1983 0.8825 0.4735 0.032 Uiso 1 1 calc R . . 
C18A C 0.2777(3) 0.4766(2) -0.18321(18) 0.0332(5) Uani 1 1 d . . . 
H18A H 0.3296 0.4849 -0.2642 0.040 Uiso 1 1 calc R . . 
C19B C 0.3654(2) 0.8377(2) 0.53526(17) 0.0262(4) Uani 1 1 d . . . 
H19B H 0.4352 0.7910 0.4812 0.031 Uiso 1 1 calc R . . 
C19A C 0.1786(3) 0.4120(2) -0.13076(18) 0.0329(5) Uani 1 1 d . . . 
H19A H 0.1612 0.3778 -0.1765 0.039 Uiso 1 1 calc R . . 
C20B C 0.4057(2) 0.8518(2) 0.61859(16) 0.0216(4) Uani 1 1 d . . . 
H20B H 0.5030 0.8157 0.6209 0.026 Uiso 1 1 calc R . . 
C20A C 0.1033(3) 0.3959(2) -0.01100(17) 0.0264(4) Uani 1 1 d . . . 
H20A H 0.0352 0.3511 0.0248 0.032 Uiso 1 1 calc R . . 
C21A C -0.0338(2) 0.30110(17) 0.26701(14) 0.0178(3) Uani 1 1 d . . . 
C21B C 0.20435(19) 0.94371(17) 0.93507(13) 0.0168(3) Uani 1 1 d . . . 
C22A C 0.0496(2) 0.17885(19) 0.29010(18) 0.0241(4) Uani 1 1 d . . . 
H22A H 0.1521 0.1575 0.2686 0.029 Uiso 1 1 calc R . . 
C22B C 0.1403(2) 1.0444(2) 0.98331(15) 0.0224(4) Uani 1 1 d . . . 
H22B H 0.1782 1.1119 0.9477 0.027 Uiso 1 1 calc R . . 
C23A C -0.0202(3) 0.0874(2) 0.3458(2) 0.0299(4) Uani 1 1 d . . . 
H23A H 0.0354 0.0037 0.3627 0.036 Uiso 1 1 calc R . . 
C23B C 0.0212(3) 1.0460(2) 1.08345(17) 0.0306(5) Uani 1 1 d . . . 
H23B H -0.0230 1.1149 1.1157 0.037 Uiso 1 1 calc R . . 
C24A C -0.1692(3) 0.1189(2) 0.37588(19) 0.0306(5) Uani 1 1 d . . . 
H24A H -0.2152 0.0564 0.4137 0.037 Uiso 1 1 calc R . . 
C24B C -0.0332(2) 0.9465(2) 1.13632(16) 0.0282(4) Uani 1 1 d . . . 
H24B H -0.1132 0.9467 1.2057 0.034 Uiso 1 1 calc R . . 
C25A C -0.2519(3) 0.2399(2) 0.35172(18) 0.0285(5) Uani 1 1 d . . . 
H25A H -0.3543 0.2604 0.3722 0.034 Uiso 1 1 calc R . . 
C25B C 0.0294(2) 0.8470(2) 1.08781(17) 0.0271(4) Uani 1 1 d . . . 
H25B H -0.0090 0.7798 1.1236 0.032 Uiso 1 1 calc R . . 
C26A C -0.1849(2) 0.3317(2) 0.29715(16) 0.0221(3) Uani 1 1 d . . . 
H26A H -0.2416 0.4151 0.2803 0.027 Uiso 1 1 calc R . . 
C26B C 0.1476(2) 0.8449(2) 0.98747(16) 0.0217(3) Uani 1 1 d . . . 
H26B H 0.1899 0.7766 0.9545 0.026 Uiso 1 1 calc R . . 
 
loop_ 
 _atom_site_aniso_label 
 _atom_site_aniso_U_11 
 _atom_site_aniso_U_22 
 _atom_site_aniso_U_33 
 _atom_site_aniso_U_23 
 _atom_site_aniso_U_13 
 _atom_site_aniso_U_12 
Pd1 0.01251(4) 0.01207(5) 0.01148(4) -0.00099(4) -0.00505(3) -0.00359(4) 
Cl1A 0.01816(17) 0.0161(2) 0.01973(15) -0.00023(15) -0.01132(13) -0.00338(16) 
P1A 0.01295(16) 0.0138(2) 0.01348(14) -0.00121(14) -0.00579(13) -0.00436(16) 
P1B 0.01452(17) 0.0122(2) 0.01486(15) -0.00364(15) -0.00767(13) -0.00105(16) 
S1A 0.01360(15) 0.01451(19) 0.01652(14) -0.00308(14) -0.00681(12) -0.00343(15) 
O1B 0.0152(5) 0.0136(6) 0.0171(4) -0.0010(4) -0.0099(4) -0.0024(5) 
C1B 0.0144(6) 0.0160(8) 0.0134(5) -0.0016(5) -0.0065(5) -0.0039(6) 
Cl1B 0.01803(17) 0.01380(19) 0.02233(16) -0.00465(16) -0.00610(14) 0.00294(16) 
O1A 0.0142(5) 0.0145(6) 0.0137(4) -0.0038(4) -0.0065(4) -0.0003(5) 
C1A 0.0135(6) 0.0119(7) 0.0149(5) -0.0027(5) -0.0070(5) -0.0006(6) 
Pd2 0.01112(4) 0.01022(5) 0.01367(4) -0.00174(4) -0.00624(3) -0.00038(4) 
Cl2 0.02078(18) 0.0167(2) 0.02227(16) 0.00025(15) -0.00773(14) -0.00890(17) 
C2B 0.0136(6) 0.0126(7) 0.0143(5) -0.0012(5) -0.0079(5) -0.0011(6) 
Cl2B 0.02187(18) 0.0204(2) 0.02030(16) -0.00271(16) -0.01424(14) 0.00036(18) 
C2A 0.0108(5) 0.0127(7) 0.0137(5) -0.0034(5) -0.0047(4) -0.0014(5) 
O2B 0.0224(6) 0.0167(7) 0.0232(5) 0.0014(5) -0.0061(5) -0.0081(6) 
S3 0.01042(14) 0.01130(17) 0.01282(13) -0.00264(13) -0.00447(11) -0.00131(14) 
C3B 0.0145(6) 0.0124(7) 0.0155(5) -0.0014(5) -0.0067(5) -0.0024(6) 
C3A 0.0104(5) 0.0143(7) 0.0147(5) -0.0042(5) -0.0042(4) -0.0017(6) 
O3 0.0185(6) 0.0143(6) 0.0329(6) -0.0104(6) -0.0133(5) 0.0044(5) 
C4B 0.0165(7) 0.0182(8) 0.0158(6) -0.0034(6) -0.0069(5) -0.0029(7) 
C4A 0.0182(7) 0.0203(9) 0.0258(7) -0.0031(7) -0.0131(6) -0.0042(7) 
C5B 0.0228(8) 0.0191(9) 0.0154(6) -0.0047(6) -0.0046(6) -0.0067(7) 
C5A 0.0212(8) 0.0302(12) 0.0377(10) -0.0081(9) -0.0155(7) -0.0080(9) 
C6B 0.0216(8) 0.0189(9) 0.0220(7) -0.0080(7) -0.0004(6) -0.0057(8) 
C6A 0.0198(8) 0.0299(11) 0.0328(9) -0.0106(8) -0.0037(7) -0.0126(8) 
C7B 0.0154(7) 0.0242(10) 0.0272(8) -0.0076(8) -0.0042(6) -0.0002(8) 
C7A 0.0249(9) 0.0242(10) 0.0187(6) -0.0029(7) -0.0021(6) -0.0145(8) 
C8B 0.0147(7) 0.0207(9) 0.0205(7) -0.0036(7) -0.0067(6) -0.0020(7) 
C8A 0.0188(7) 0.0204(9) 0.0151(6) -0.0032(6) -0.0042(5) -0.0088(7) 
C9B 0.0217(7) 0.0206(9) 0.0202(6) -0.0068(7) -0.0119(6) -0.0027(7) 
C9A 0.0118(6) 0.0146(8) 0.0155(5) -0.0008(6) -0.0043(5) -0.0032(6) 
C10B 0.0312(10) 0.0357(12) 0.0182(7) -0.0080(8) -0.0065(7) -0.0141(10) 
C10A 0.0190(7) 0.0173(8) 0.0205(6) -0.0025(6) -0.0048(6) -0.0072(7) 
C11B 0.0406(12) 0.0207(10) 0.0321(9) -0.0117(8) -0.0210(9) 0.0021(9) 
C11A 0.0135(7) 0.0243(10) 0.0275(8) 0.0001(8) -0.0048(6) -0.0049(8) 
C12B 0.0284(9) 0.0315(12) 0.0356(9) -0.0124(9) -0.0196(8) -0.0057(9) 
C12A 0.0249(8) 0.0245(10) 0.0140(6) -0.0050(6) -0.0033(6) -0.0082(8) 
C13B 0.0181(7) 0.0156(8) 0.0188(6) -0.0011(6) -0.0081(5) -0.0046(7) 
C13A 0.0140(6) 0.0135(8) 0.0180(6) -0.0046(6) -0.0081(5) 0.0020(6) 
C14B 0.0354(12) 0.0204(11) 0.0383(11) 0.0071(9) -0.0136(10) -0.0109(11) 
C14A 0.0219(8) 0.0196(10) 0.0367(10) -0.0120(9) -0.0130(8) 0.0073(8) 
C15B 0.0173(7) 0.0155(8) 0.0168(6) -0.0016(6) -0.0080(5) -0.0062(6) 
C15A 0.0204(7) 0.0155(8) 0.0165(6) -0.0052(6) -0.0090(6) 0.0022(7) 
C16B 0.0190(7) 0.0224(9) 0.0249(7) -0.0048(7) -0.0115(6) -0.0053(7) 
C16A 0.0247(9) 0.0271(10) 0.0170(6) -0.0045(7) -0.0054(6) -0.0061(9) 
C17B 0.0241(8) 0.0286(11) 0.0318(9) -0.0064(8) -0.0180(7) -0.0058(9) 
C17A 0.0266(10) 0.0369(13) 0.0183(7) -0.0046(8) -0.0025(7) -0.0038(10) 
C18B 0.0304(10) 0.0329(12) 0.0271(8) -0.0070(8) -0.0154(7) -0.0126(10) 
C18A 0.0297(11) 0.0351(13) 0.0185(7) -0.0087(9) -0.0083(7) 0.0083(10) 
C19B 0.0261(9) 0.0354(12) 0.0243(7) -0.0125(8) -0.0083(7) -0.0109(9) 
C19A 0.0440(13) 0.0298(12) 0.0230(8) -0.0138(9) -0.0175(8) 0.0046(11) 
C20B 0.0181(7) 0.0272(10) 0.0219(7) -0.0088(7) -0.0074(6) -0.0054(8) 
C20A 0.0352(11) 0.0225(10) 0.0247(8) -0.0097(8) -0.0159(7) -0.0014(9) 
C21A 0.0222(7) 0.0151(8) 0.0201(6) -0.0037(6) -0.0122(6) -0.0041(7) 
C21B 0.0144(6) 0.0193(9) 0.0153(6) -0.0001(6) -0.0063(5) -0.0057(7) 
C22A 0.0295(9) 0.0151(9) 0.0339(9) -0.0046(8) -0.0216(8) -0.0019(8) 
C22B 0.0227(8) 0.0272(10) 0.0174(6) -0.0067(7) -0.0017(6) -0.0109(8) 
C23A 0.0423(12) 0.0144(10) 0.0398(10) 0.0035(8) -0.0306(10) -0.0059(10) 
C23B 0.0281(10) 0.0397(13) 0.0218(7) -0.0126(9) 0.0038(7) -0.0150(11) 
C24A 0.0429(13) 0.0259(11) 0.0308(9) 0.0049(8) -0.0213(9) -0.0184(11) 
C24B 0.0191(8) 0.0414(13) 0.0175(7) -0.0023(8) -0.0018(6) -0.0113(10) 
C25A 0.0322(10) 0.0303(12) 0.0286(8) -0.0038(8) -0.0096(8) -0.0175(10) 
C25B 0.0207(8) 0.0299(11) 0.0234(7) 0.0048(8) -0.0056(7) -0.0125(9) 
C26A 0.0216(8) 0.0206(9) 0.0264(7) -0.0046(7) -0.0097(6) -0.0072(8) 
C26B 0.0184(7) 0.0190(9) 0.0228(7) 0.0020(7) -0.0067(6) -0.0071(7) 
 
_geom_special_details 
; 
 All esds (except the esd in the dihedral angle between two l.s. planes) 
 are estimated using the full covariance matrix.  The cell esds are taken 
 into account individually in the estimation of esds in distances, angles 
 and torsion angles; correlations between esds in cell parameters are only 
 used when they are defined by crystal symmetry.  An approximate (isotropic) 
 treatment of cell esds is used for estimating esds involving l.s. planes. 
; 
 
loop_ 
 _geom_bond_atom_site_label_1 
 _geom_bond_atom_site_label_2 
 _geom_bond_distance 
 _geom_bond_site_symmetry_2 
 _geom_bond_publ_flag 
Pd1 P1A 2.2113(4) . ? 
Pd1 S1A 2.3005(5) . ? 
Pd1 Cl1A 2.3167(5) . ? 
Pd1 Cl2 2.3612(4) . ? 
P1A O1B 1.6114(15) . ? 
P1A C21B 1.7988(15) . ? 
P1A C15B 1.8063(15) . ? 
P1B O1A 1.6069(14) . ? 
P1B C15A 1.8016(16) . ? 
P1B C21A 1.8057(17) . ? 
P1B Pd2 2.2016(4) . ? 
S1A C2B 1.8375(17) . ? 
S1A C9B 1.8845(15) . ? 
O1B C1B 1.441(2) . ? 
C1B C13B 1.525(3) . ? 
C1B C2B 1.542(2) . ? 
Cl1B Pd2 2.3697(4) . ? 
O1A C1A 1.442(2) . ? 
C1A C13A 1.510(3) . ? 
C1A C2A 1.5436(19) . ? 
Pd2 S3 2.3101(4) . ? 
Pd2 Cl2B 2.3227(5) . ? 
C2B C3B 1.515(2) . ? 
C2A C3A 1.517(2) . ? 
C2A S3 1.8287(17) . ? 
O2B C13B 1.412(2) . ? 
O2B C14B 1.427(3) . ? 
S3 C9A 1.8802(15) . ? 
C3B C8B 1.383(3) . ? 
C3B C4B 1.406(2) . ? 
C3A C8A 1.397(3) . ? 
C3A C4A 1.399(3) . ? 
O3 C14A 1.415(3) . ? 
O3 C13A 1.4181(19) . ? 
C4B C5B 1.395(2) . ? 
C4A C5A 1.391(3) . ? 
C5B C6B 1.384(3) . ? 
C5A C6A 1.391(3) . ? 
C6B C7B 1.389(3) . ? 
C6A C7A 1.389(3) . ? 
C7B C8B 1.398(2) . ? 
C7A C8A 1.393(2) . ? 
C9B C12B 1.526(3) . ? 
C9B C10B 1.531(3) . ? 
C9B C11B 1.534(3) . ? 
C9A C11A 1.521(3) . ? 
C9A C10A 1.529(2) . ? 
C9A C12A 1.536(2) . ? 
C15B C16B 1.396(3) . ? 
C15B C20B 1.399(2) . ? 
C15A C16A 1.393(3) . ? 
C15A C20A 1.400(2) . ? 
C16B C17B 1.393(2) . ? 
C16A C17A 1.397(2) . ? 
C17B C18B 1.396(3) . ? 
C17A C18A 1.396(3) . ? 
C18B C19B 1.378(3) . ? 
C18A C19A 1.377(4) . ? 
C19B C20B 1.397(2) . ? 
C19A C20A 1.400(3) . ? 
C21A C22A 1.392(3) . ? 
C21A C26A 1.403(3) . ? 
C21B C22B 1.398(2) . ? 
C21B C26B 1.400(2) . ? 
C22A C23A 1.407(3) . ? 
C22B C23B 1.391(2) . ? 
C23A C24A 1.381(4) . ? 
C23B C24B 1.392(3) . ? 
C24A C25A 1.380(4) . ? 
C24B C25B 1.387(3) . ? 
C25A C26A 1.392(3) . ? 
C25B C26B 1.388(3) . ? 
 
loop_ 
 _geom_angle_atom_site_label_1 
 _geom_angle_atom_site_label_2 
 _geom_angle_atom_site_label_3 
 _geom_angle 
 _geom_angle_site_symmetry_1 
 _geom_angle_site_symmetry_3 
 _geom_angle_publ_flag 
P1A Pd1 S1A 96.759(17) . . ? 
P1A Pd1 Cl1A 85.510(17) . . ? 
S1A Pd1 Cl1A 172.655(13) . . ? 
P1A Pd1 Cl2 171.506(14) . . ? 
S1A Pd1 Cl2 86.577(16) . . ? 
Cl1A Pd1 Cl2 92.151(17) . . ? 
O1B P1A C21B 107.35(8) . . ? 
O1B P1A C15B 98.05(7) . . ? 
C21B P1A C15B 106.62(7) . . ? 
O1B P1A Pd1 114.20(5) . . ? 
C21B P1A Pd1 113.50(6) . . ? 
C15B P1A Pd1 115.70(6) . . ? 
O1A P1B C15A 96.98(8) . . ? 
O1A P1B C21A 107.73(8) . . ? 
C15A P1B C21A 109.89(7) . . ? 
O1A P1B Pd2 114.04(4) . . ? 
C15A P1B Pd2 117.83(7) . . ? 
C21A P1B Pd2 109.49(6) . . ? 
C2B S1A C9B 104.57(8) . . ? 
C2B S1A Pd1 113.75(5) . . ? 
C9B S1A Pd1 110.83(7) . . ? 
C1B O1B P1A 122.09(10) . . ? 
O1B C1B C13B 106.82(12) . . ? 
O1B C1B C2B 113.09(13) . . ? 
C13B C1B C2B 109.46(14) . . ? 
C1A O1A P1B 123.12(10) . . ? 
O1A C1A C13A 105.83(12) . . ? 
O1A C1A C2A 112.77(14) . . ? 
C13A C1A C2A 110.87(12) . . ? 
P1B Pd2 S3 94.591(16) . . ? 
P1B Pd2 Cl2B 86.765(17) . . ? 
S3 Pd2 Cl2B 178.557(17) . . ? 
P1B Pd2 Cl1B 176.857(17) . . ? 
S3 Pd2 Cl1B 87.343(16) . . ? 
Cl2B Pd2 Cl1B 91.324(17) . . ? 
C3B C2B C1B 114.67(11) . . ? 
C3B C2B S1A 106.56(11) . . ? 
C1B C2B S1A 116.49(12) . . ? 
C3A C2A C1A 115.24(11) . . ? 
C3A C2A S3 108.00(12) . . ? 
C1A C2A S3 115.96(11) . . ? 
C13B O2B C14B 110.81(18) . . ? 
C2A S3 C9A 104.45(8) . . ? 
C2A S3 Pd2 114.65(5) . . ? 
C9A S3 Pd2 113.83(5) . . ? 
C8B C3B C4B 119.18(14) . . ? 
C8B C3B C2B 119.72(15) . . ? 
C4B C3B C2B 121.10(16) . . ? 
C8A C3A C4A 119.14(14) . . ? 
C8A C3A C2A 122.27(15) . . ? 
C4A C3A C2A 118.50(16) . . ? 
C14A O3 C13A 110.83(14) . . ? 
C5B C4B C3B 120.27(18) . . ? 
C5A C4A C3A 120.20(19) . . ? 
C6B C5B C4B 119.91(17) . . ? 
C4A C5A C6A 120.62(19) . . ? 
C5B C6B C7B 120.12(15) . . ? 
C7A C6A C5A 119.22(16) . . ? 
C6B C7B C8B 120.0(2) . . ? 
C6A C7A C8A 120.6(2) . . ? 
C3B C8B C7B 120.47(18) . . ? 
C7A C8A C3A 120.17(17) . . ? 
C12B C9B C10B 110.24(19) . . ? 
C12B C9B C11B 110.93(17) . . ? 
C10B C9B C11B 110.49(18) . . ? 
C12B C9B S1A 105.24(12) . . ? 
C10B C9B S1A 113.71(11) . . ? 
C11B C9B S1A 106.06(13) . . ? 
C11A C9A C10A 111.03(14) . . ? 
C11A C9A C12A 110.51(14) . . ? 
C10A C9A C12A 110.59(16) . . ? 
C11A C9A S3 105.44(12) . . ? 
C10A C9A S3 113.90(10) . . ? 
C12A C9A S3 105.12(10) . . ? 
O2B C13B C1B 108.81(15) . . ? 
O3 C13A C1A 108.09(13) . . ? 
C16B C15B C20B 120.06(15) . . ? 
C16B C15B P1A 120.51(12) . . ? 
C20B C15B P1A 119.41(14) . . ? 
C16A C15A C20A 120.17(16) . . ? 
C16A C15A P1B 117.86(12) . . ? 
C20A C15A P1B 121.93(14) . . ? 
C17B C16B C15B 120.03(17) . . ? 
C15A C16A C17A 120.46(17) . . ? 
C16B C17B C18B 119.5(2) . . ? 
C18A C17A C16A 119.2(2) . . ? 
C19B C18B C17B 120.79(16) . . ? 
C19A C18A C17A 120.46(17) . . ? 
C18B C19B C20B 120.13(17) . . ? 
C18A C19A C20A 120.90(18) . . ? 
C19B C20B C15B 119.52(19) . . ? 
C15A C20A C19A 118.8(2) . . ? 
C22A C21A C26A 120.08(17) . . ? 
C22A C21A P1B 121.37(15) . . ? 
C26A C21A P1B 118.29(15) . . ? 
C22B C21B C26B 119.75(14) . . ? 
C22B C21B P1A 120.84(12) . . ? 
C26B C21B P1A 119.38(13) . . ? 
C21A C22A C23A 119.0(2) . . ? 
C23B C22B C21B 120.07(17) . . ? 
C24A C23A C22A 120.3(2) . . ? 
C22B C23B C24B 119.90(18) . . ? 
C25A C24A C23A 120.84(19) . . ? 
C25B C24B C23B 120.05(16) . . ? 
C24A C25A C26A 119.7(2) . . ? 
C24B C25B C26B 120.52(18) . . ? 
C25A C26A C21A 120.0(2) . . ? 
C25B C26B C21B 119.70(18) . . ? 
 
loop_ 
 _geom_torsion_atom_site_label_1 
 _geom_torsion_atom_site_label_2 
 _geom_torsion_atom_site_label_3 
 _geom_torsion_atom_site_label_4 
 _geom_torsion 
 _geom_torsion_site_symmetry_1 
 _geom_torsion_site_symmetry_2 
 _geom_torsion_site_symmetry_3 
 _geom_torsion_site_symmetry_4 
 _geom_torsion_publ_flag 
S1A Pd1 P1A O1B -24.17(5) . . . . ? 
Cl1A Pd1 P1A O1B 162.85(5) . . . . ? 
Cl2 Pd1 P1A O1B 88.57(14) . . . . ? 
S1A Pd1 P1A C21B 99.33(7) . . . . ? 
Cl1A Pd1 P1A C21B -73.65(7) . . . . ? 
Cl2 Pd1 P1A C21B -147.93(13) . . . . ? 
S1A Pd1 P1A C15B -136.93(7) . . . . ? 
Cl1A Pd1 P1A C15B 50.10(7) . . . . ? 
Cl2 Pd1 P1A C15B -24.19(16) . . . . ? 
P1A Pd1 S1A C2B 18.41(5) . . . . ? 
Cl1A Pd1 S1A C2B 126.03(12) . . . . ? 
Cl2 Pd1 S1A C2B -153.75(5) . . . . ? 
P1A Pd1 S1A C9B -99.08(6) . . . . ? 
Cl1A Pd1 S1A C9B 8.54(14) . . . . ? 
Cl2 Pd1 S1A C9B 88.76(6) . . . . ? 
C21B P1A O1B C1B -69.50(12) . . . . ? 
C15B P1A O1B C1B -179.80(11) . . . . ? 
Pd1 P1A O1B C1B 57.25(11) . . . . ? 
P1A O1B C1B C13B 160.76(10) . . . . ? 
P1A O1B C1B C2B -78.76(15) . . . . ? 
C15A P1B O1A C1A -174.09(12) . . . . ? 
C21A P1B O1A C1A -60.57(12) . . . . ? 
Pd2 P1B O1A C1A 61.18(12) . . . . ? 
P1B O1A C1A C13A 161.58(10) . . . . ? 
P1B O1A C1A C2A -77.05(14) . . . . ? 
O1A P1B Pd2 S3 -29.69(5) . . . . ? 
C15A P1B Pd2 S3 -142.40(7) . . . . ? 
C21A P1B Pd2 S3 91.09(6) . . . . ? 
O1A P1B Pd2 Cl2B 150.80(5) . . . . ? 
C15A P1B Pd2 Cl2B 38.09(7) . . . . ? 
C21A P1B Pd2 Cl2B -88.42(6) . . . . ? 
O1A P1B Pd2 Cl1B 98.2(3) . . . . ? 
C15A P1B Pd2 Cl1B -14.5(4) . . . . ? 
C21A P1B Pd2 Cl1B -141.0(3) . . . . ? 
O1B C1B C2B C3B -61.2(2) . . . . ? 
C13B C1B C2B C3B 57.78(18) . . . . ? 
O1B C1B C2B S1A 64.22(14) . . . . ? 
C13B C1B C2B S1A -176.81(10) . . . . ? 
C9B S1A C2B C3B -147.56(11) . . . . ? 
Pd1 S1A C2B C3B 91.39(11) . . . . ? 
C9B S1A C2B C1B 83.03(12) . . . . ? 
Pd1 S1A C2B C1B -38.02(12) . . . . ? 
O1A C1A C2A C3A -65.68(19) . . . . ? 
C13A C1A C2A C3A 52.8(2) . . . . ? 
O1A C1A C2A S3 61.87(15) . . . . ? 
C13A C1A C2A S3 -179.66(11) . . . . ? 
C3A C2A S3 C9A -145.20(10) . . . . ? 
C1A C2A S3 C9A 83.74(12) . . . . ? 
C3A C2A S3 Pd2 89.55(9) . . . . ? 
C1A C2A S3 Pd2 -41.52(12) . . . . ? 
P1B Pd2 S3 C2A 24.40(5) . . . . ? 
Cl2B Pd2 S3 C2A -176(13) . . . . ? 
Cl1B Pd2 S3 C2A -153.12(5) . . . . ? 
P1B Pd2 S3 C9A -95.78(6) . . . . ? 
Cl2B Pd2 S3 C9A 64.2(6) . . . . ? 
Cl1B Pd2 S3 C9A 86.70(6) . . . . ? 
C1B C2B C3B C8B -110.40(18) . . . . ? 
S1A C2B C3B C8B 119.15(15) . . . . ? 
C1B C2B C3B C4B 70.4(2) . . . . ? 
S1A C2B C3B C4B -60.07(16) . . . . ? 
C1A C2A C3A C8A 81.6(2) . . . . ? 
S3 C2A C3A C8A -49.81(15) . . . . ? 
C1A C2A C3A C4A -101.81(17) . . . . ? 
S3 C2A C3A C4A 126.74(14) . . . . ? 
C8B C3B C4B C5B 0.5(2) . . . . ? 
C2B C3B C4B C5B 179.75(15) . . . . ? 
C8A C3A C4A C5A -0.4(3) . . . . ? 
C2A C3A C4A C5A -177.02(16) . . . . ? 
C3B C4B C5B C6B -1.6(2) . . . . ? 
C3A C4A C5A C6A 1.1(3) . . . . ? 
C4B C5B C6B C7B 1.4(3) . . . . ? 
C4A C5A C6A C7A -1.0(3) . . . . ? 
C5B C6B C7B C8B -0.2(3) . . . . ? 
C5A C6A C7A C8A 0.1(3) . . . . ? 
C4B C3B C8B C7B 0.7(2) . . . . ? 
C2B C3B C8B C7B -178.57(16) . . . . ? 
C6B C7B C8B C3B -0.8(3) . . . . ? 
C6A C7A C8A C3A 0.6(3) . . . . ? 
C4A C3A C8A C7A -0.5(2) . . . . ? 
C2A C3A C8A C7A 176.04(14) . . . . ? 
C2B S1A C9B C12B 74.50(15) . . . . ? 
Pd1 S1A C9B C12B -162.53(13) . . . . ? 
C2B S1A C9B C10B -46.25(18) . . . . ? 
Pd1 S1A C9B C10B 76.72(17) . . . . ? 
C2B S1A C9B C11B -167.87(14) . . . . ? 
Pd1 S1A C9B C11B -44.90(15) . . . . ? 
C2A S3 C9A C11A -167.43(11) . . . . ? 
Pd2 S3 C9A C11A -41.65(12) . . . . ? 
C2A S3 C9A C10A -45.46(14) . . . . ? 
Pd2 S3 C9A C10A 80.32(14) . . . . ? 
C2A S3 C9A C12A 75.75(13) . . . . ? 
Pd2 S3 C9A C12A -158.47(11) . . . . ? 
C14B O2B C13B C1B -167.36(16) . . . . ? 
O1B C1B C13B O2B -67.18(15) . . . . ? 
C2B C1B C13B O2B 170.05(12) . . . . ? 
C14A O3 C13A C1A -178.52(15) . . . . ? 
O1A C1A C13A O3 -65.76(16) . . . . ? 
C2A C1A C13A O3 171.66(13) . . . . ? 
O1B P1A C15B C16B 146.47(15) . . . . ? 
C21B P1A C15B C16B 35.58(17) . . . . ? 
Pd1 P1A C15B C16B -91.68(14) . . . . ? 
O1B P1A C15B C20B -35.11(16) . . . . ? 
C21B P1A C15B C20B -146.00(15) . . . . ? 
Pd1 P1A C15B C20B 86.74(16) . . . . ? 
O1A P1B C15A C16A -52.30(19) . . . . ? 
C21A P1B C15A C16A -164.06(17) . . . . ? 
Pd2 P1B C15A C16A 69.62(19) . . . . ? 
O1A P1B C15A C20A 125.57(18) . . . . ? 
C21A P1B C15A C20A 13.8(2) . . . . ? 
Pd2 P1B C15A C20A -112.51(17) . . . . ? 
C20B C15B C16B C17B -0.5(3) . . . . ? 
P1A C15B C16B C17B 177.91(16) . . . . ? 
C20A C15A C16A C17A -1.7(4) . . . . ? 
P1B C15A C16A C17A 176.19(19) . . . . ? 
C15B C16B C17B C18B 0.0(3) . . . . ? 
C15A C16A C17A C18A 0.4(4) . . . . ? 
C16B C17B C18B C19B 0.8(3) . . . . ? 
C16A C17A C18A C19A 1.3(4) . . . . ? 
C17B C18B C19B C20B -1.2(3) . . . . ? 
C17A C18A C19A C20A -1.5(4) . . . . ? 
C18B C19B C20B C15B 0.6(3) . . . . ? 
C16B C15B C20B C19B 0.2(3) . . . . ? 
P1A C15B C20B C19B -178.25(15) . . . . ? 
C16A C15A C20A C19A 1.5(4) . . . . ? 
P1B C15A C20A C19A -176.35(19) . . . . ? 
C18A C19A C20A C15A 0.1(4) . . . . ? 
O1A P1B C21A C22A -23.56(15) . . . . ? 
C15A P1B C21A C22A 81.01(16) . . . . ? 
Pd2 P1B C21A C22A -148.09(13) . . . . ? 
O1A P1B C21A C26A 150.69(13) . . . . ? 
C15A P1B C21A C26A -104.75(15) . . . . ? 
Pd2 P1B C21A C26A 26.16(15) . . . . ? 
O1B P1A C21B C22B 133.36(16) . . . . ? 
C15B P1A C21B C22B -122.37(17) . . . . ? 
Pd1 P1A C21B C22B 6.19(19) . . . . ? 
O1B P1A C21B C26B -48.69(17) . . . . ? 
C15B P1A C21B C26B 55.58(18) . . . . ? 
Pd1 P1A C21B C26B -175.86(14) . . . . ? 
C26A C21A C22A C23A -1.2(3) . . . . ? 
P1B C21A C22A C23A 172.96(14) . . . . ? 
C26B C21B C22B C23B 0.4(3) . . . . ? 
P1A C21B C22B C23B 178.33(19) . . . . ? 
C21A C22A C23A C24A 0.6(3) . . . . ? 
C21B C22B C23B C24B 0.7(4) . . . . ? 
C22A C23A C24A C25A 0.2(3) . . . . ? 
C22B C23B C24B C25B -1.3(4) . . . . ? 
C23A C24A C25A C26A -0.5(3) . . . . ? 
C23B C24B C25B C26B 0.9(4) . . . . ? 
C24A C25A C26A C21A -0.1(3) . . . . ? 
C22A C21A C26A C25A 0.9(3) . . . . ? 
P1B C21A C26A C25A -173.41(14) . . . . ? 
C24B C25B C26B C21B 0.2(3) . . . . ? 
C22B C21B C26B C25B -0.8(3) . . . . ? 
P1A C21B C26B C25B -178.81(18) . . . . ? 
 
_diffrn_measured_fraction_theta_max    0.824 
_diffrn_reflns_theta_full              38.13 
_diffrn_measured_fraction_theta_full   0.824 
_refine_diff_density_max    1.437 
_refine_diff_density_min   -0.607 
_refine_diff_density_rms    0.072 
